# Supplementary material for: Predicting clinically significant prostate cancer using DCE-MRI habitat descriptors
Source: PubMed Central journal article supplement (PMC6324677; doi:10.18632/oncotarget.26437), 2018-12-14
Supplement: oncotarget-09-37125-s001.pdf [file oncotarget-09-37125-s001.pdf]

## Predicting clinically significant prostate cancer using DCE-MRI habitat descriptors

### SUPPLEMENTARY MATERIALS

**Supplementary Table 1: Pairwise significance of difference between DCE feature tuples for Institution I.** DeLong test was used with significance level set to 0.05. The 28 feature tuples correspond to those in Figure 2, flatten in row-major order.

See Supplementary File 1

**Supplementary Table 2: Pairwise significance of difference between DCE feature tuples for Institution II.** DeLong test was used with significance level set to 0.05. The 28 feature tuples correspond to those in Figure 2, flatten in row-major order.

See Supplementary File 2
